# Supplementary material for: Guanidinylated nanochitins: guanidinylated chitin nanocrystals are dispersible at neutral pH
Source: Royal Society of Chemistry journal article supplement (doi:10.1039/d5tb01771h), 2025-12-03
Supplement: d5tb01771h1.pdf [file d5tb01771h1.pdf]

## Supplementary Information

### Guanidinylated Nanochitins: Guanidinylated Chitin Nanocrystal is Dispersible at Neutral pH

Hironori Izawa,<sup>a\*</sup> Sota Ando,<sup>b</sup> Kensei Sone,<sup>a</sup> Wataru Tajima,<sup>b</sup> Dagmawi Abebe Zewude,<sup>c</sup> ,  
Yusuke Yamashita,<sup>a</sup> Shinsuke Ifuku<sup>d\*</sup>

<sup>a</sup>Faculty of Engineering, University of Miyazaki, 1-1 Gakuen Kibanadai-Nishi, Miyazaki 889-2192, Japan. <sup>b</sup>Graduate School of Engineering, University of Miyazaki, 1-1 Gakuen Kibanadai-Nishi, Miyazaki 889-2192, Japan. <sup>c</sup>Department of Chemistry and Biotechnology, Faculty of Engineering, Tottori University, 4-101 Koyama-Minami, Tottori 680-8550, Japan. <sup>d</sup>Research Institute for Sustainable Humanosphere, Kyoto University, Uji 611-0011, Japan.

## S1. $^{13}\text{C}$ NMR analysis of the surface chitosan on GChNC

The GChNC (30 mg) was added to 2% DCl-D<sub>2</sub>O (1.0 mL) and heated at 80°C with stirring for 24 h. The GCNC suspension was centrifuged and supernatant was applied to  $^{13}\text{C}$  NMR measurement (**Figure S1**). In the spectrum, the signals attributed to the quaternary carbon in the guanidine groups are observed at around 158 ppm (**b**).<sup>S1</sup> This result also supports the presence of guanidino group on GChNC surface.

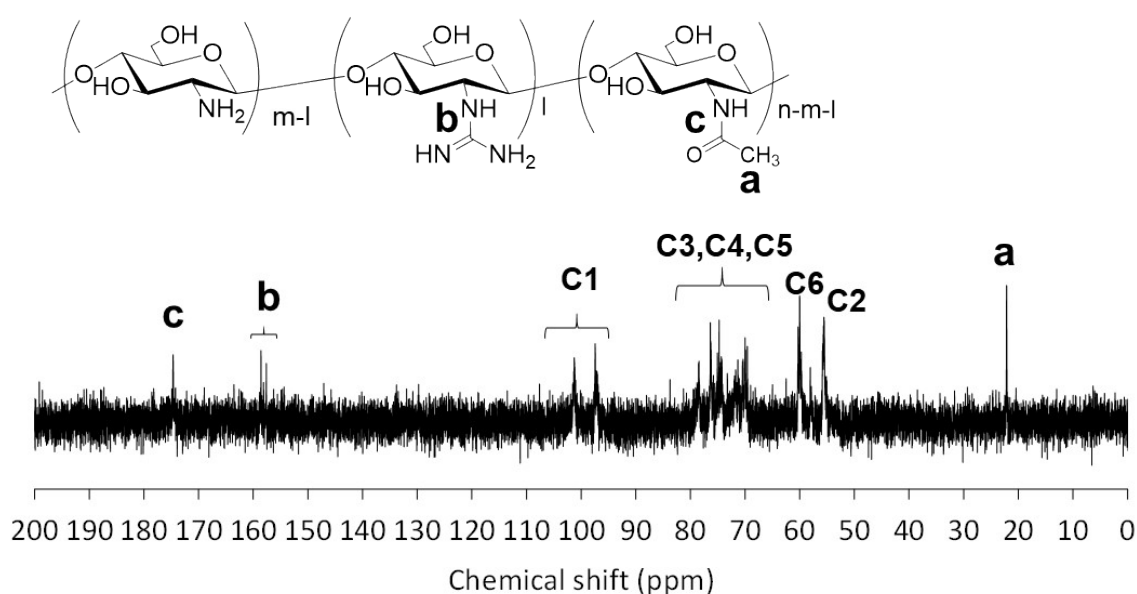

**Figure S1.**  $^{13}\text{C}$  NMR spectrum of the soluble chitosan/chitin fraction extracted from GChNC surface in 2% DCl-D<sub>2</sub>O.

## S2. Dispersibility of GChNC in simulated body fluid

Figure 2S shows photo image of a 0.1 wt% GChNC dispersion prepared in simulated body fluid (SBF) using an ultrasonic homogenizer.<sup>S2</sup> The GChNC particles were homogeneously dispersed by sonication. However, after 30 min, visible macroscopic aggregates were observed. This aggregation is likely caused by ionic interactions between guanidino groups and  $\text{CO}_3^{2-}$ ,  $\text{PO}_4^{3-}$ , and  $\text{SO}_4^{2-}$  anions.

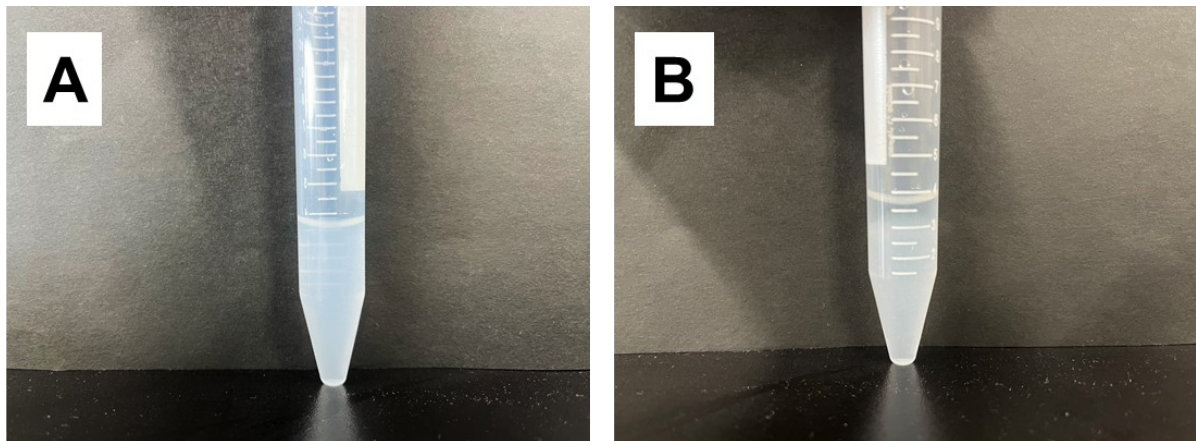

**Figure S2.** Photo image of the 0.1% GChNC dispersion prepared with the SBF after sonication (A) and after 30 min (B).

### **S3. Preparation of homogeneous GChNF dispersion by a high pressure homogenization treatment**

The GChNF dispersion prepared by the ultrasonic treatment was additionally defibrate by the high pressure homogenization treatment (star burst system, sugino machine limited, Japan). The transparency was clearly increased (**Figures S3A and B**). The homogenously defibrated GChNF was observed by the SEM analysis (**Figure S3C**). The viscosity of the 1.0% GChNF dispersion prepared with the high pressure homogenization treatment was 47,650 mPa·s, which was higher than that of the 1.0% GChNF dispersion prepared by the sonication treatment (30,243 mPa·s). This result suggests that defibration was enhanced by the high pressure homogenization treatment.

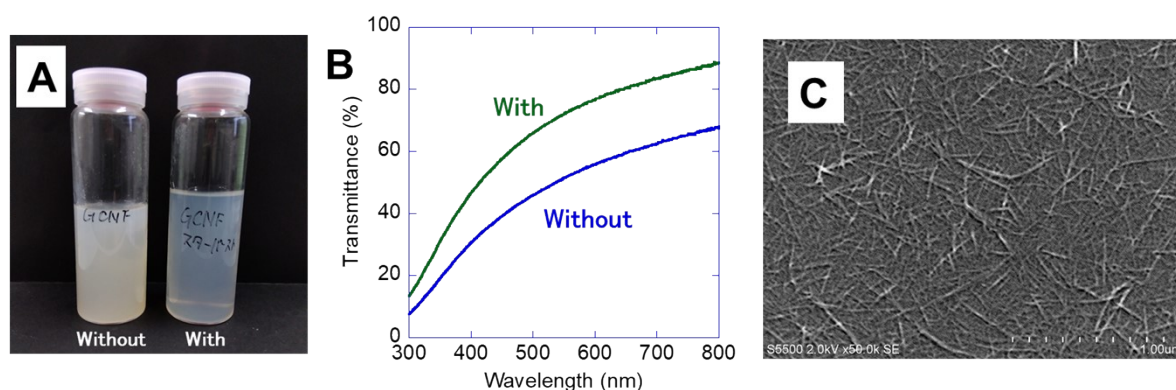

**Figure S3.** Photo image (A) and transmittance spectra (B) of the 1.0% GChNF dispersion prepared with or without the high pressure homogenization treatment. SEM image of the GChNF dispersion prepared with the high pressure homogenization treatment (C).

#### S4. Injectability of gelatin-GCNC composite hydrogel.

The gelatin-GChNC solution prepared by heating at 60°C was loaded into a syringe. The gelatin-GChNC solution in the syringe was gelled upon cooling to room temperature (**Figure S4A**). The gelatin-GChNC gel was successfully ejected from the syringe by extrusion while maintaining its gel state, indicating its injectability (**Figure S4B**).

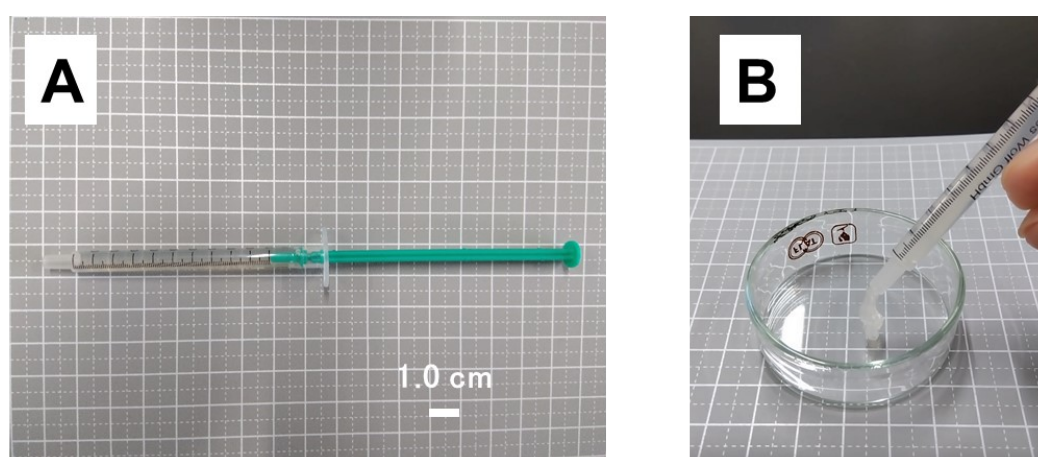

**Figure S4.** Photo images of the syringe with the gelatin-GChNC composite hydrogel (A) and its injection (B).

## Supplementary references

- S1. H. Izawa, M. Kinai, S. Ifuku, M. Morimoto and H. Saimoto, *Int J Biol Macromol*, 2019, **125**, 901-905.
- S2. T. Kokubo, H. Takadama, *Biomaterials*, 2006, **27**, 2907-2915.
